# Supplementary material for: Neurologic complications of sickle cell disease in Africa: A systematic review and meta-analysis
Source: PubMed Central journal article supplement (PMC5631172; doi:10.1212/wnl.0000000000004537), 2017-10-03
Supplement: supp_WNL.0000000000004537_e-figures.pdf [file supp_WNL.0000000000004537_e-figures.pdf]

**Figure e-1: Meta-analysis of the prevalence of stroke in sickle cell disease according to study size**

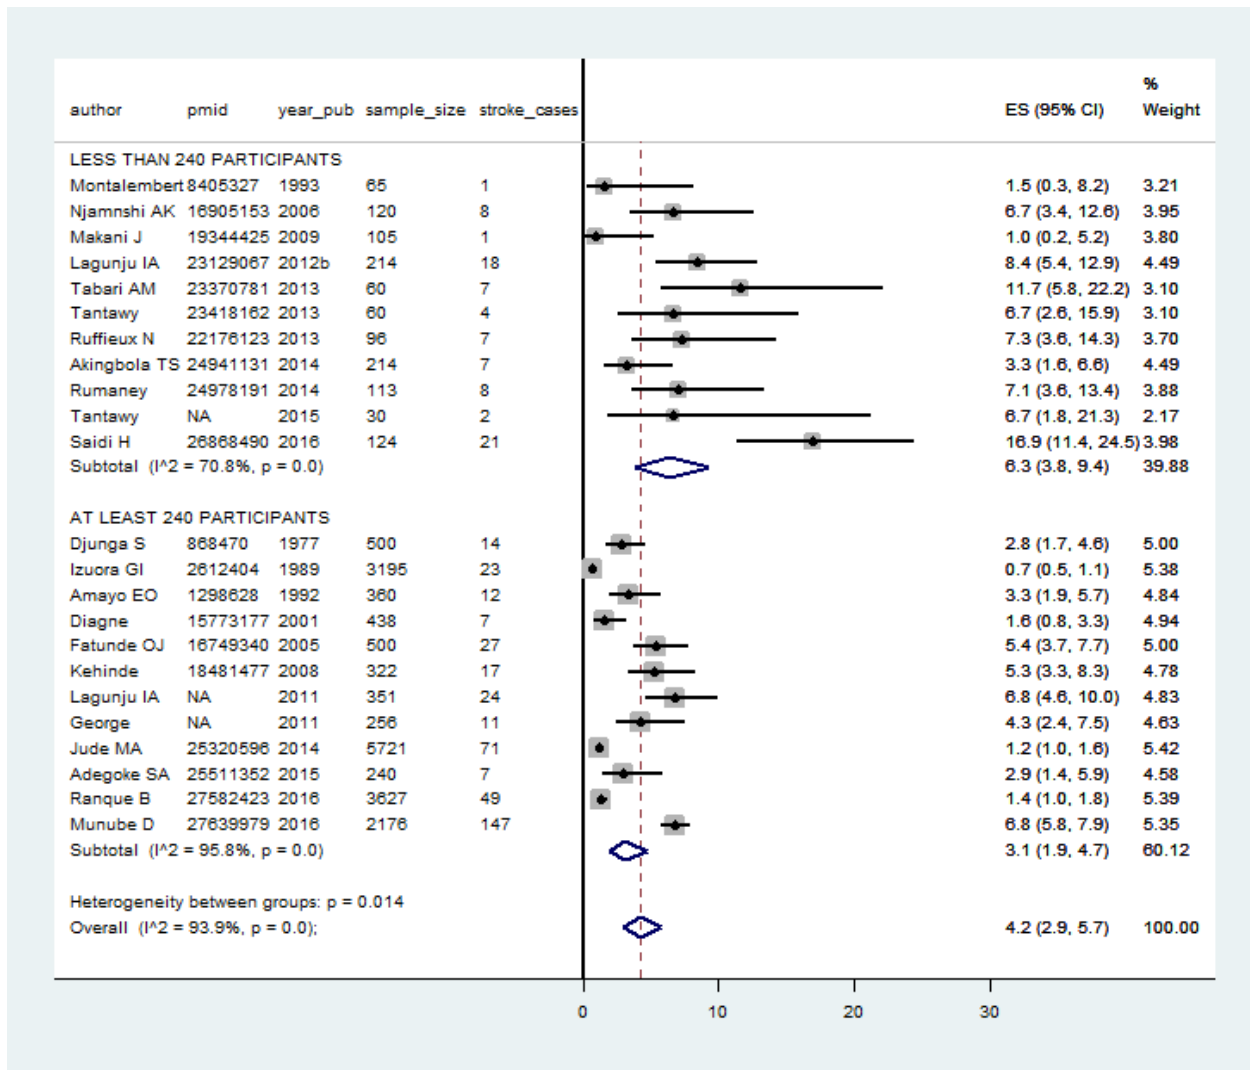

ES = Effect Size, CI = Confidence Interval, NA = Not available (article not indexed in PubMed / No accession number available)

**Figure e-2: Funnel plot showing the 23 studies reporting the prevalence of stroke in sickle cell disease**

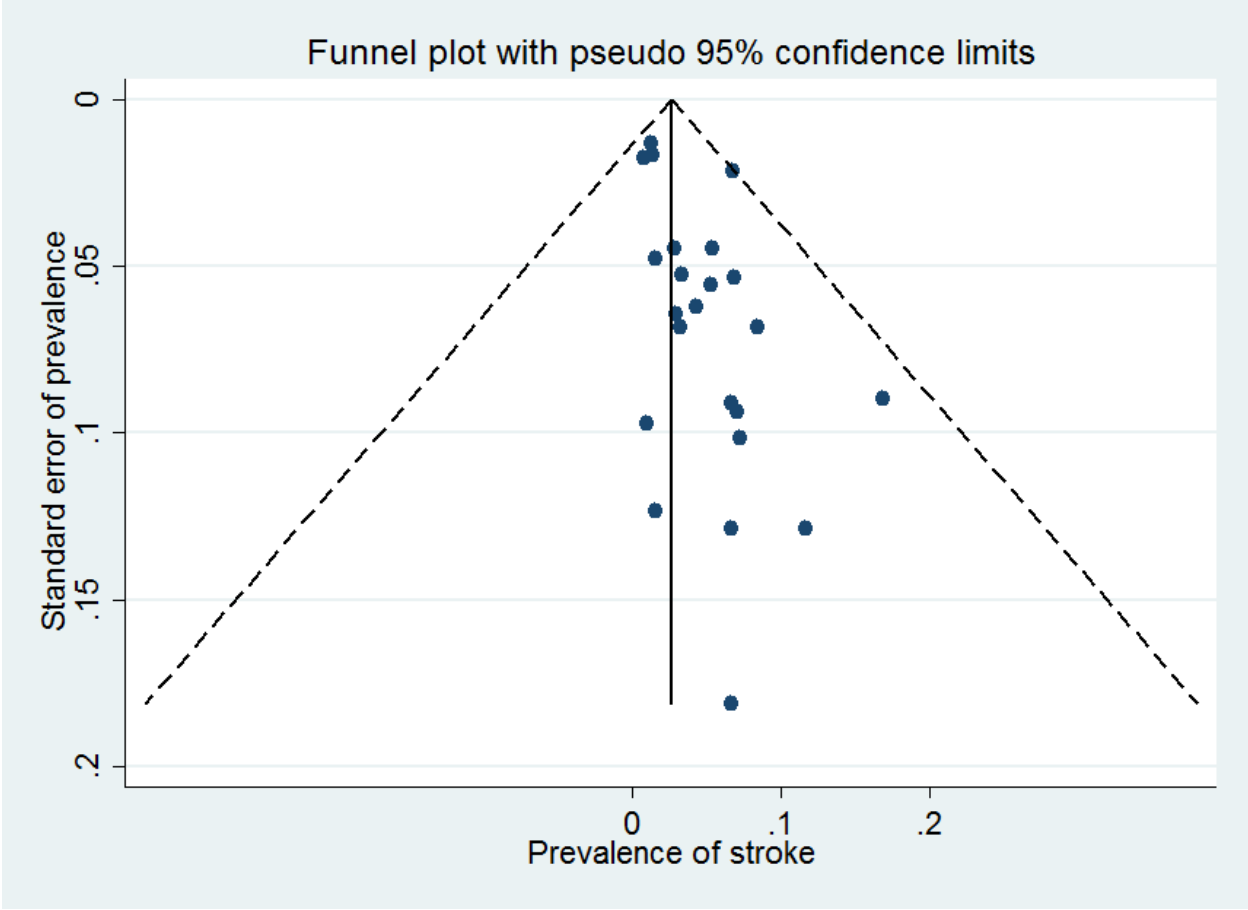

**Figure e-3: Meta-analysis of the prevalence of stroke in sickle cell disease according to year of publication**

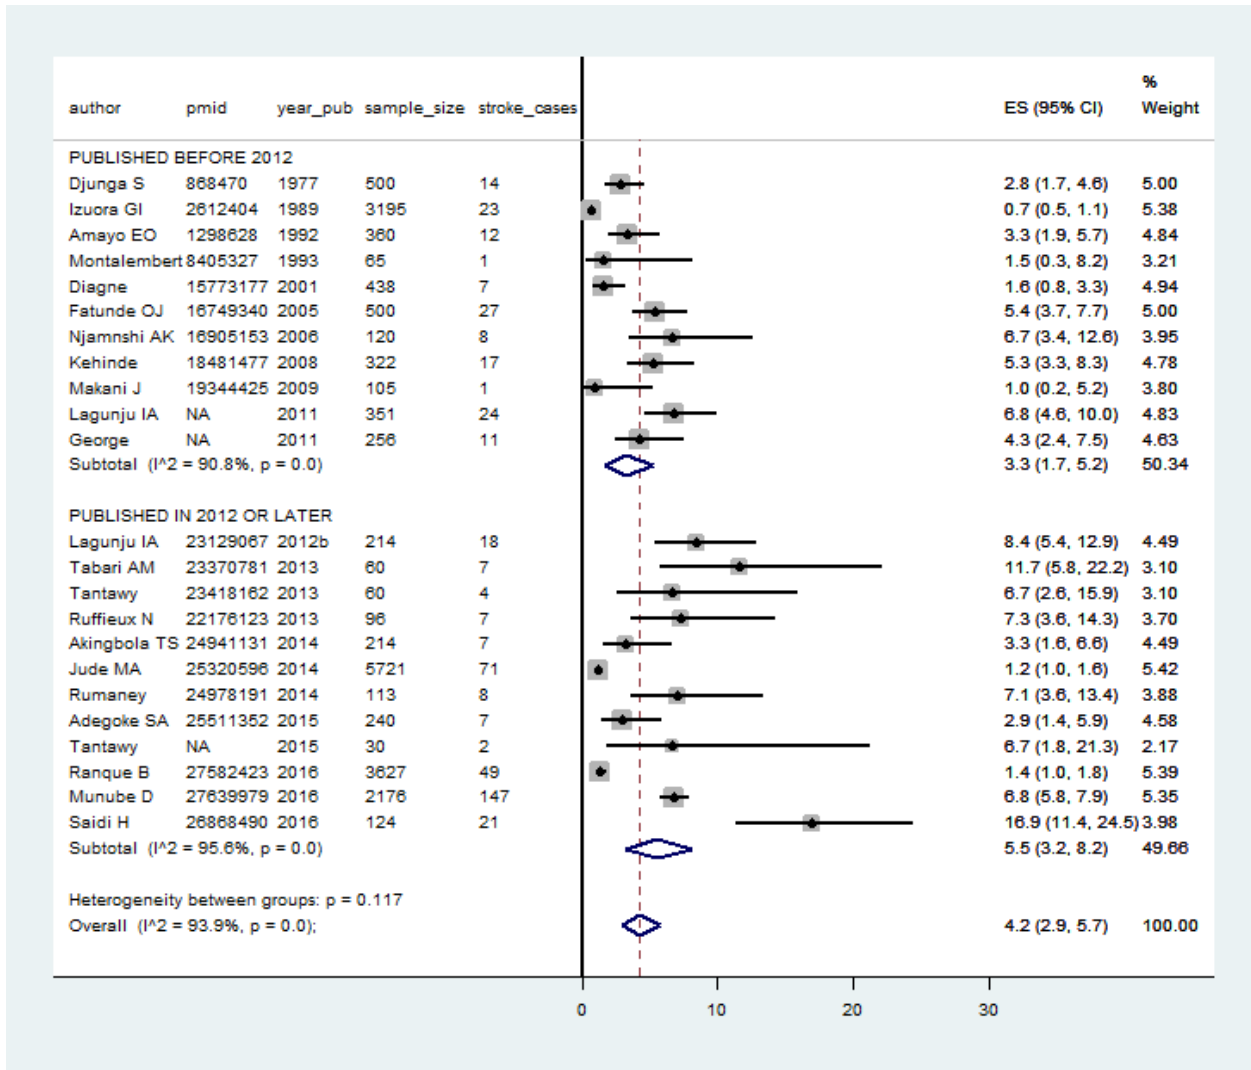

ES = Effect Size, CI = Confidence Interval, NA = Not available (article not indexed in PubMed / No accession number available)

**Figure e-4: Meta-analysis of the prevalence of seizure in sickle cell disease according to year of publication**

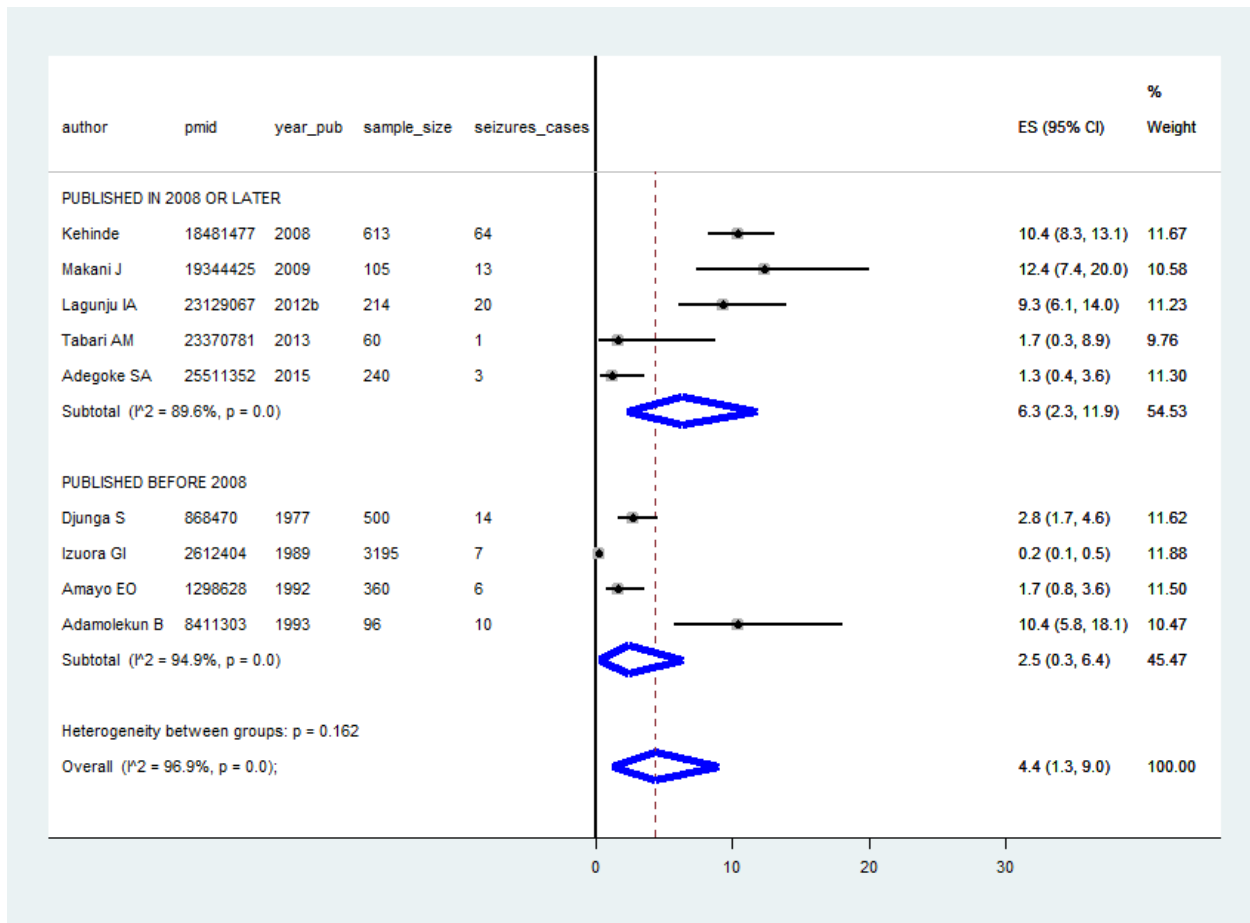

ES = Effect Size, CI = Confidence Interval

**Figure e-5: Meta-analysis of the prevalence of febrile convulsions in sickle cell disease**

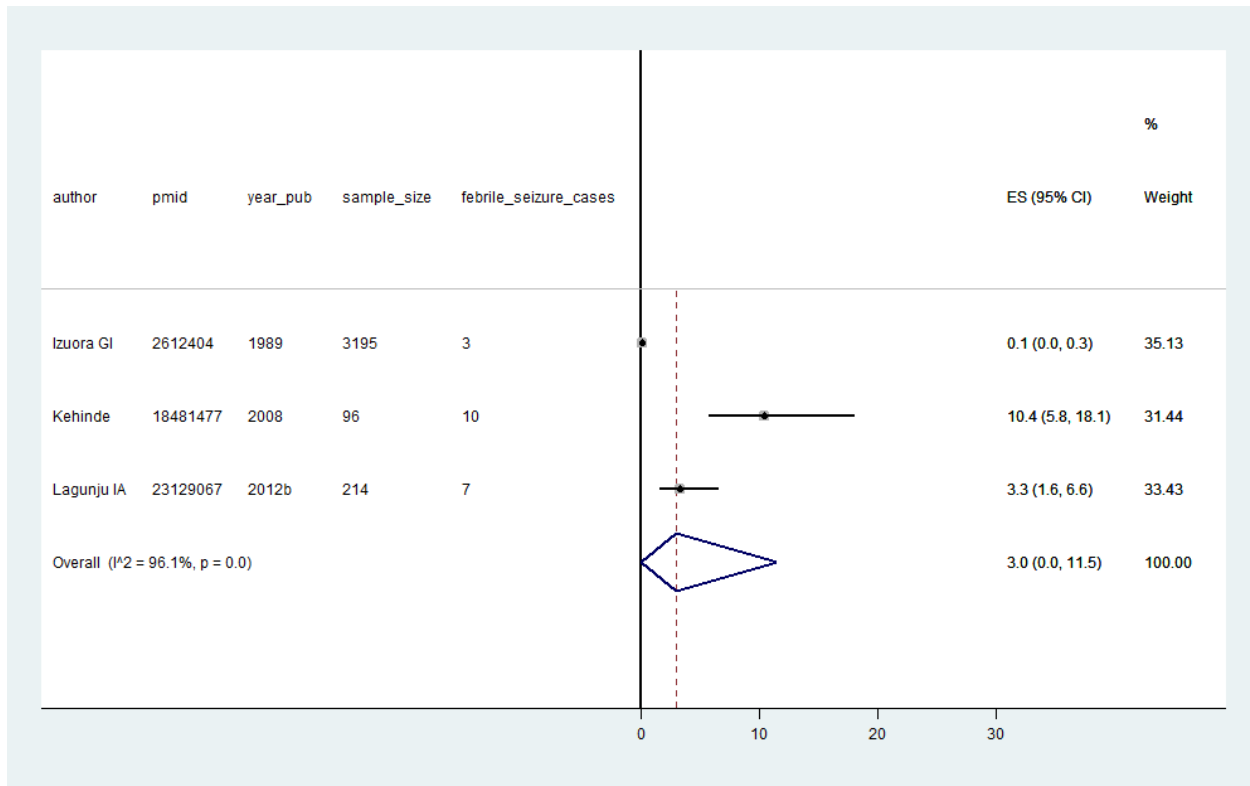

ES = Effect Size, CI = Confidence Interval

**Figure e-6: Meta-analysis of the prevalence of epilepsy in sickle cell disease**

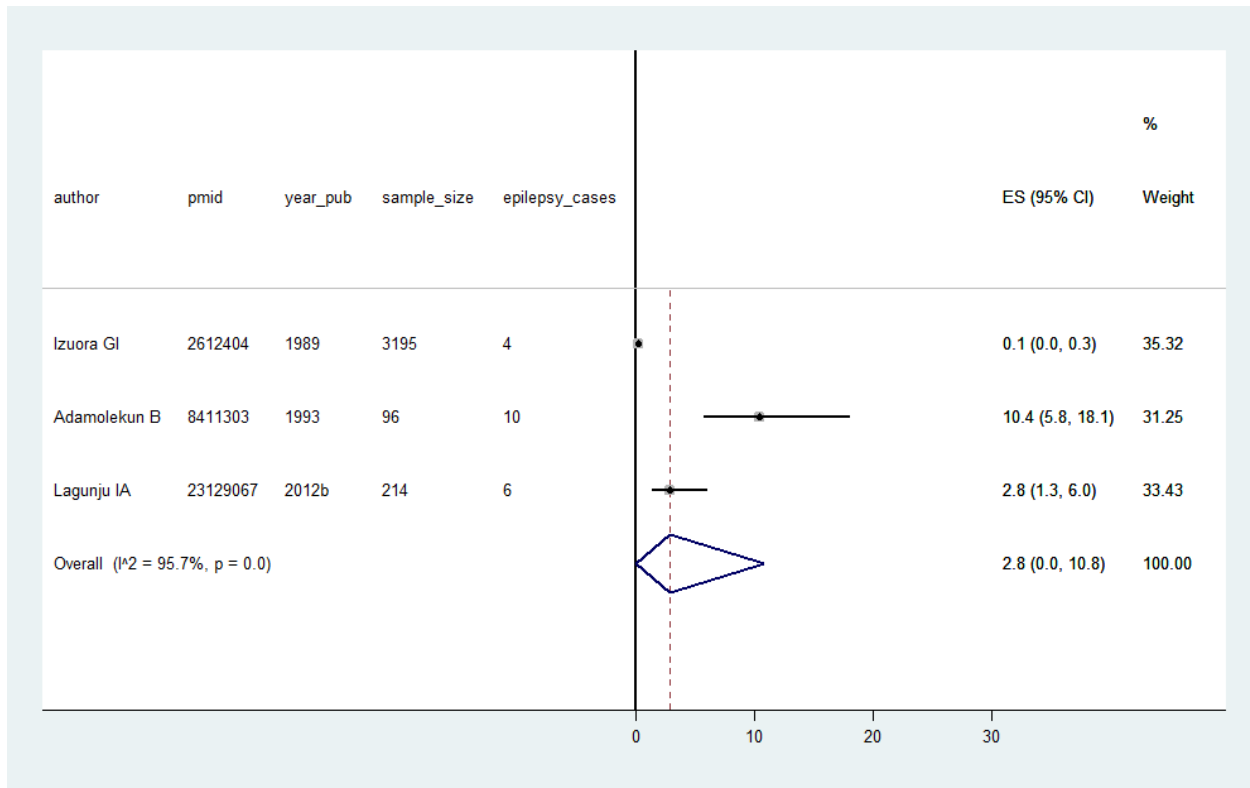

ES = Effect Size, CI = Confidence Interval
